# Supplementary material for: Trajectory analysis of single molecules exhibiting non-Brownian motion
Source: Royal Society of Chemistry journal article supplement (doi:10.1039/c0cp01805h), 2011-01-01
Supplement: c0cp01805h.zip [file Matlab program notes.docx]

**Matlab program notes**

Radius of Gyration Evolution code

Main function is RgEvolution.m. IgorPro function RgEvolutionPlotting.ipf can be used to plot the output results, by typing DoAllStuff() in command line, choosing the desired .dat file, and choosing graph by adjusting Graph0 in lines:

PlotTrajectories("Graph0", sTime,sList,";")

ModifyTrajectoryPlot("Graph0")

Confinement Level code

Main function is probaconf_modified.m. If graph = 1 in the inputs, a figure window with plots of the trajectory, the confinement level calculation, and the instantaneous diffusion coefficient will be displayed for each trajectory.

Statistical Analysis of Lateral Diffusion and Multistate Kinetics code

Main function is analysis_modified.m. The four result plots will be displayed in separate figure windows after analysis is complete.

Time Series Analysis code

Main function is Main_modified.m, current directory must be the folder containing the files to run the program. Two plots (PDF and MSD) will be displayed for each trajectory, all in different figure windows. If this is too much output, uncomment ‘close all’ in FitMSD.m and FitPlot.m.
